# Supplementary material
Source: PubMed Central journal article supplement (PMC7241251)

In the format provided by the authors and unedited.

# Loss of ADAR1 in tumours overcomes resistance to immune checkpoint blockade

Jeffrey J. Ishizuka<sup>1,2,3,9</sup>, Robert T. Manguso<sup>1,3,9</sup>, Collins K. Cheruiyot<sup>1,3</sup>, Kevin Bi<sup>1,3</sup>, Arpit Panda<sup>1,3,4</sup>, Arvin Iracheta-Vellve<sup>1,3</sup>, Brian C. Miller<sup>1,2,3</sup>, Peter P. Du<sup>1,3</sup>, Kathleen B. Yates<sup>1,3</sup>, Juan Dubrot<sup>1,3</sup>, Ilana Buchumenski<sup>5</sup>, Dawn E. Comstock<sup>1,3,4</sup>, Flavian D. Brown<sup>1,3,4</sup>, Austin Ayer<sup>1,3</sup>, Ian C. Kohnle<sup>1,3</sup>, Hans W. Pope<sup>1,3</sup>, Margaret D. Zimmer<sup>1,3</sup>, Debattama R. Sen<sup>1,3,4</sup>, Sarah K. Lane-Reticker<sup>1,3</sup>, Emily J. Robitschek<sup>1,3</sup>, Gabriel K. Griffin<sup>1,3,6</sup>, Natalie B. Collins<sup>1,3,7</sup>, Adrienne H. Long<sup>1,3</sup>, John G. Doench<sup>3</sup>, David Kozono<sup>8</sup>, Erez Y. Levanon<sup>5</sup> & W. Nicholas Haining<sup>1,3,7\*</sup>

<sup>1</sup>Department of Pediatric Oncology, Dana-Farber Cancer Institute, Boston, MA, USA. <sup>2</sup>Department of Medical Oncology, Dana-Farber Cancer Institute, Boston, MA, USA. <sup>3</sup>Broad Institute of Harvard and Massachusetts Institute of Technology, Cambridge, MA, USA. <sup>4</sup>Division of Medical Sciences, Harvard Medical School, Boston, MA, USA. <sup>5</sup>Mina and Everard Goodman Faculty of Life Sciences, Bar-Ilan University, Ramat Gan, Israel. <sup>6</sup>Department of Pathology, Brigham and Women's Hospital, Boston, MA, USA. <sup>7</sup>Division of Pediatric Hematology and Oncology, Children's Hospital, Boston, Massachusetts, USA. <sup>8</sup>Department of Radiation Oncology, Dana-Farber Cancer Institute, Boston, MA, USA. <sup>9</sup>These authors contributed equally: Jeffrey J. Ishizuka, Robert T. Manguso.

\*e-mail: [nicholas\\_haining@dfci.harvard.edu](mailto:nicholas_haining@dfci.harvard.edu)

## Supplementary Text:

### I. Enhanced responses to checkpoint blockade in *Adar1* null tumors are not driven by engraftment efficiency or tumor size at the time of treatment

We considered the possibility that improved responses to checkpoint blockade in *Adar1* null tumors were due simply to poor engraftment of *Adar1* null tumor cells, which could make them more responsive to treatment by virtue of smaller tumor size at the outset of therapy. To test this, we enforced equivalent size of tumors at the beginning of PD-1 treatment by increasing the number of inoculated *Adar1* null tumor cells and using Matrigel to enhance engraftment. Despite matched sizes at the start of treatment, *Adar1* null tumors remained significantly more susceptible to immunotherapy compared to similarly sized control tumors (Extended Data Fig. 1e). Thus, a difference in tumor size at the initiation of treatment does not explain the profound sensitivity of *Adar1* null tumors to checkpoint blockade.

### II. Hyperediting in human tumors is associated with decreased immune infiltration and inflammatory response

Many human tumors have amplifications of the *ADAR1* locus<sup>40-42</sup> and increased A-to-I editing levels compared to non-malignant tissues<sup>37, 43</sup>. We reasoned that *ADAR1* amplification might prevent immunostimulatory dsRNA from eliciting an inflammatory response. To determine whether increased A-to-I editing of dsRNA in human tumors was associated with reduced inflammation in human cancer, we compared levels of RNA hyperediting previously characterized within The Cancer Genome Atlas (TCGA)<sup>37</sup> to gene expression signatures of inflammatory response and immune infiltration<sup>31, 38</sup>. We found that increased A-to-I hyperediting was negatively correlated with expression signatures of inflammation ( $P = 1.98e^{-6}$ , Kolmogorov-Smirnov test), response to IFN $\gamma$  ( $P = 0.012$ ), evidence of apoptosis ( $P = 1.113e^{-7}$ ), as well as two measurements of inferred immune infiltration (Extended Data Fig. 8a and b,  $P = 9.108e^{-6}$  and 0.0029). This suggests that RNA editing may play a role in constraining anti-tumor immune responses in human cancer.

## Supplementary Information References

40. Fumagalli, D. *et al.* Principles Governing A-to-I RNA Editing in the Breast Cancer Transcriptome. *Cell Rep.* **13**, 277–289 (2015).
41. Chan, T. H. M. *et al.* ADAR-Mediated RNA Editing Predicts Progression and Prognosis of Gastric Cancer. *Gastroenterology* **151**, 637–650.e10 (2016).
42. Anadón, C. *et al.* Gene amplification-associated overexpression of the RNA editing enzyme ADAR1 enhances human lung tumorigenesis. *Oncogene* **35**, 4422 (2016).
43. Han, L. *et al.* The Genomic Landscape and Clinical Relevance of A-to-I RNA Editing in Human Cancers. *Cancer Cell* **28**, 515–528 (2015).



Extended Data Figure 5a

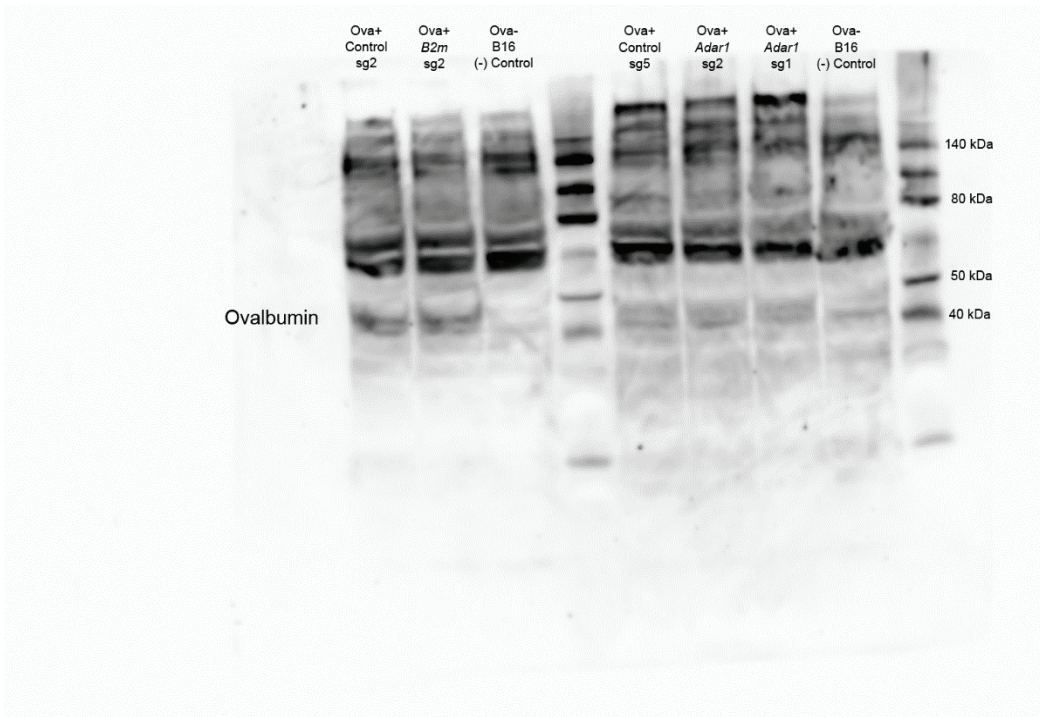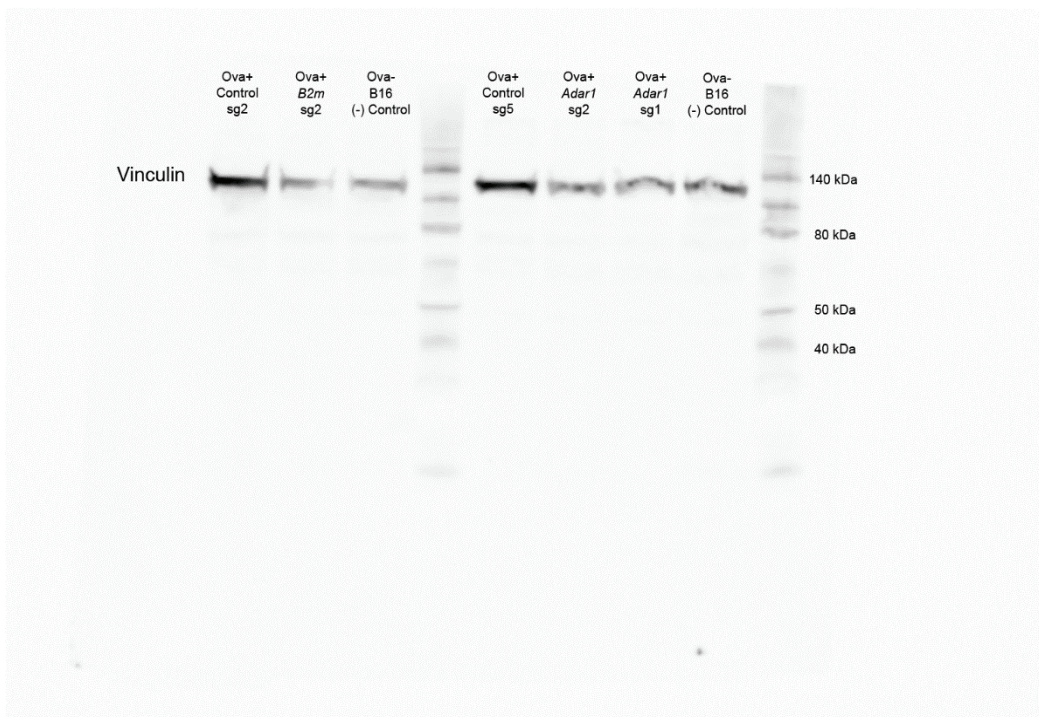

Extended Data Figure 6a

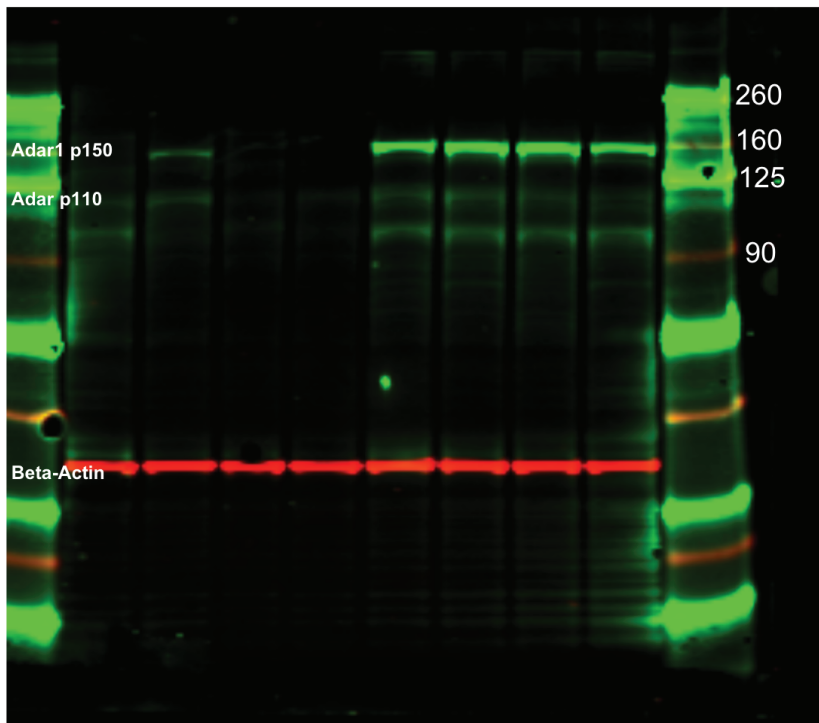

Extended Data Figure 6c

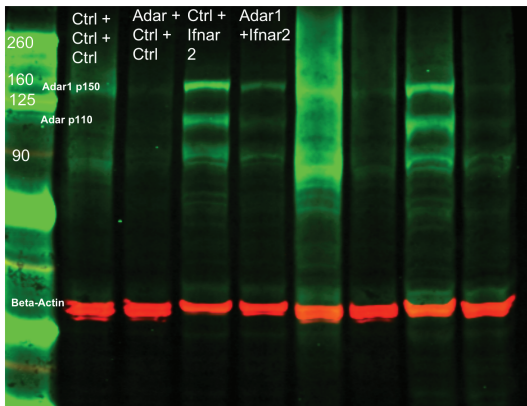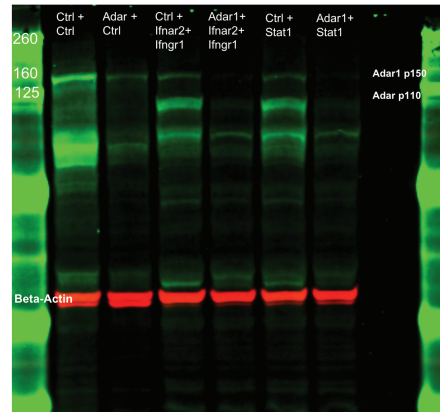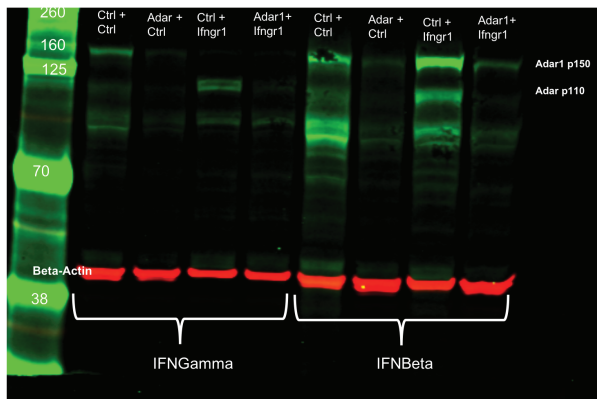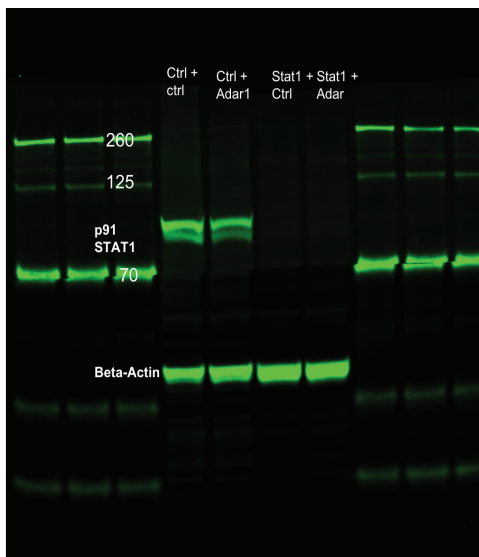

Extended Data Figure 7e

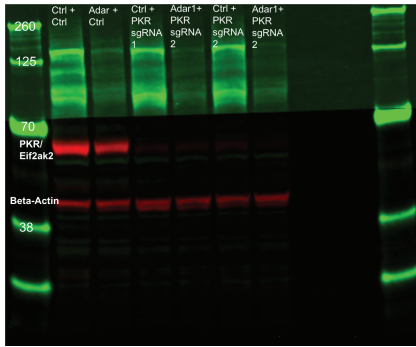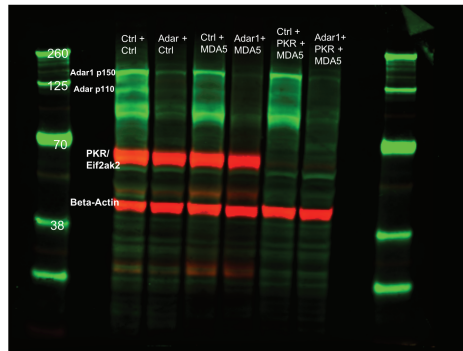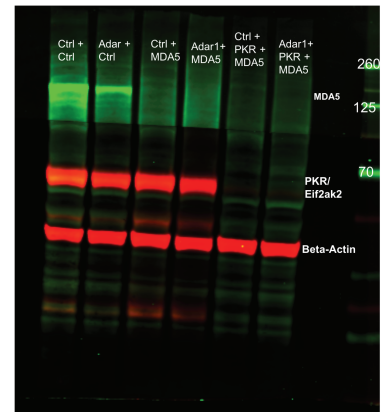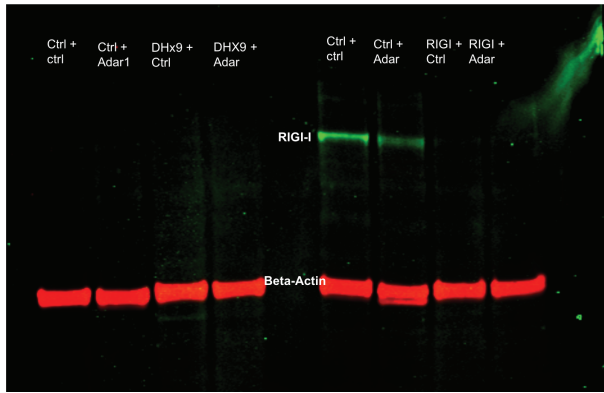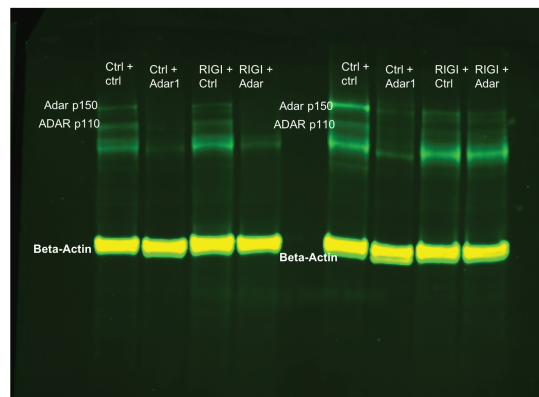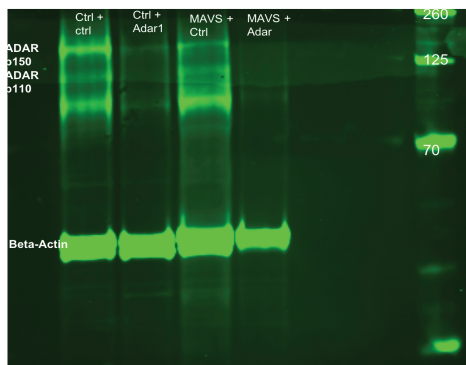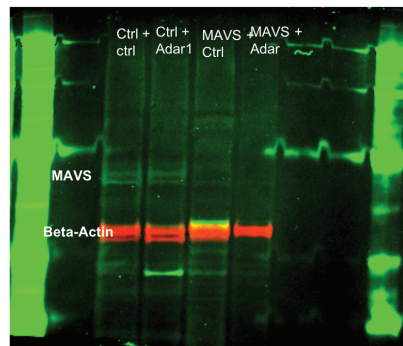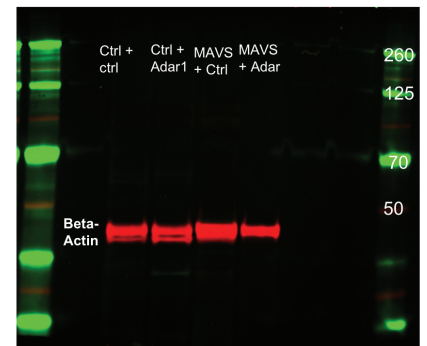

Same Blots, different exposure of the 800nm Green

Extended Data Figure 9a

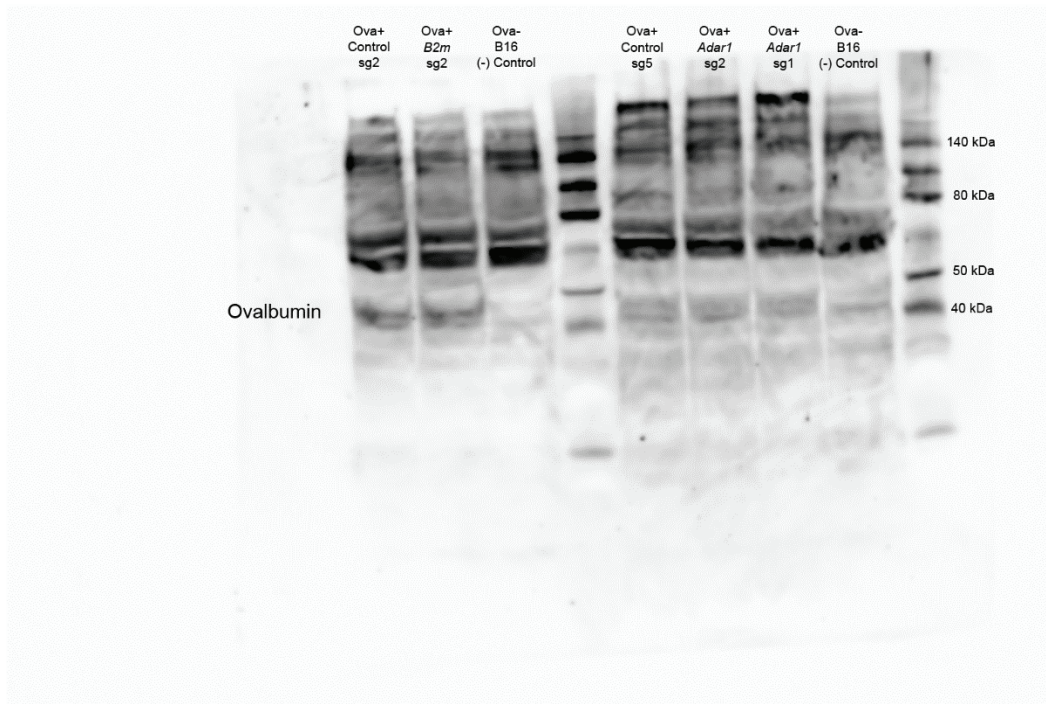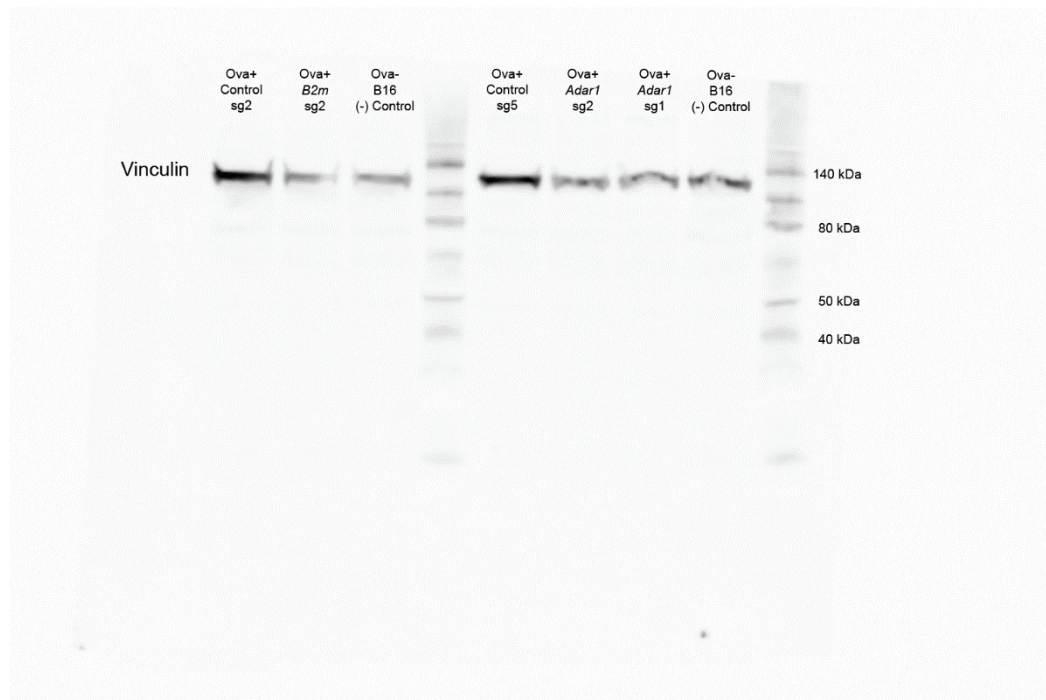

Supplement: NIHMS1560729-supplement-Supplementary_Information.pdf [file NIHMS1560729-supplement-Supplementary_Information.pdf]
